# Supplementary material
Source: publisher figshare collection journal article supplement (https://wiley.figshare.com/ndownloader/files/15456818)
Supplement: Supplementary file 1 [file 15456818]

## Sheet: DATA
Subject Code	Group	MVF	rMT	Expectation_1	Expectation_2	TENS_Efficacy_1	TENS_Efficacy_2	Force_peak_B	Force_peak_F	Normalized_Force_peak_B	Normalized_Force_peak_F	Strong_Press_B	Strong_Press_F	Perception_Force_B	Perception_Force_F	Sense_Effort_B	Sense_Effort_F	MEP_FDI_B	MEP_FDI_F	CSP_FDI_B	CSP_FDI_F
R3	verb+cond+	15.27	63	0.8	0.43	2.41	1.45	15.2	14.76	99.56	96.66	49	34	5.44	3.26	15	14	1	1.51	149.03	129.57
R5	verb+cond+	22.15	70	0.73	1.52	4.26	8.34	20.18	23.32	91.13	105.27	41.9	92	7.32	6.31	13	15	1.96	1.85	150.32	167.81
R7	verb+cond+	21.42	65	1.04	1.07	4.92	4.64	20.58	20.21	96.09	94.37	48	30	5.91	5.56	16	15	2.54	1.51	148.92	173.57
R9	verb+cond+	21.44	57	0	0.44	1.1	2.11	20.16	20.09	94.04	93.72	48	44	6.87	2.96	12	14	2.64	3.42	161.96	148.99
R10	verb+cond+	20.84	72	1.38	0.95	4.76	4.97	16.45	16.08	78.95	77.16	52	32	6.09	4.79	14	14	4.32	2.74	182.76	205.56
R14	verb+cond+	19.28	67	1.21	2.38	7.21	3.55	15.85	15.32	82.22	79.47	42	18	3.41	3.41	15	15	3.93	2.68	152.29	157.73
R17	verb+cond+	20.04	53	1.08	1.56	7.2	7.4	19.41	21.46	96.84	107.08	44	90	4.98	7.2	12	13	6.75	6.47	171.69	158.7
R21	verb+cond+	20.74	51	0.55	1.6	5.31	5.72	17.35	18.34	83.67	88.44	54	78	5.53	5.25	14	13	2.19	1.23	170.6	165.9
R22	verb+cond+	17.16	68	1.02	1.08	0	6.13	16.55	17.13	96.46	99.82	52	92	4.78	6.26	10	8	4.79	4.95	192.32	175.81
R23	verb+cond+	22.14	63	1.06	1.02	7.8	5.25	17.45	17.78	78.81	80.31	56	64	4.4	3.33	13	12	2.97	0.84	154.85	163.25
R24	verb+cond+	18.32	55	2	2.02	5.6	5.38	17.29	17.74	94.37	96.83	34	68	5.09	4.5	12	12	3.64	1.38	167.03	166.5
R25	verb+cond+	18.33	50	0.89	1.02	5.06	0	18.82	19.46	102.67	106.18	44	72	5.28	2.14	12	13	5.57	3.59	187.98	147.83
R26	verb+cond+	12.87	60	0.51	0	1.92	0.66	12.35	13.11	95.97	101.83	50	84	5.63	4.87	11	11	3.17	2.76	151.09	179.48
R2	verb+cond-	21.01	66	0.51	0.59	0	4.7	19.03	22.13	90.59	105.34	36	96	5.5	6	9	10	3.14	4.07	175.04	172.78
R4	verb+cond-	21	56	1.08	-0.52	5.5	1.3	17.36	16.89	82.67	80.46	44	24	8.21	6.74	13	14	4	3.05	167.58	149.25
R6	verb+cond-	22.66	73	0	-0.04	0	0	20.16	19.73	88.99	87.09	60	34	5.72	2.77	14	14	1.7	1.52	174.15	152.8
R8	verb+cond-	18.09	65	0.7	-0.69	5.3	2.1	21.5	20	118.89	110.44	48	18	8.15	4.67	13	13	1.97	3.5	175.01	146.27
R11	verb+cond-	19.83	64	1.73	0.17	5.22	5.58	18.82	20.86	94.91	105.16	52	94	6.52	7.6	14	11	1.69	2.09	205.36	161.25
R15	verb+cond-	17.81	64	2.24	2.6	4.71	7.22	16.64	17.14	93.45	96.26	46	76	6.36	8.83	9	7	2.89	3.52	170.98	139.02
R19	verb+cond-	15.75	60	1.36	0.48	0	7	15.29	14.23	97.05	90.33	50	0	8.2	7.75	14	13	2	1.94	158.68	195.26
R20	verb+cond-	16.39	58	1.2	2.02	8.97	9.71	14.4	19.51	87.89	119.07	52	98	7.67	9.02	14	13	3.55	4.72	137.58	137.29
R27	verb+cond-	14.95	47	-1.04	1.06	8.49	4.97	15.34	15.2	102.62	101.67	52	36	7.89	8.43	11	11	3.07	0.68	136.84	142.94
R28	verb+cond-	21.02	60	1.55	0.45	1.01	3.74	23.22	20.59	110.46	97.95	42	6	5.09	6.38	11	10	1.94	2.19	177.8	171.65
R29	verb+cond-	19.78	48	1.42	1.02	1	5.66	17.75	17.36	89.74	87.75	58	24	6.32	7.01	11	11	1.59	1.93	144.04	156.54
R30	verb+cond-	17.51	62	2	1.53	6.57	9.43	16.13	17.19	92.09	98.18	38	86	4.43	8.3	11	9	2.72	1.98	140.34	141.63
R31	verb+cond-	16.83	42	0.96	0.89	4.03	6.24	16.09	16.52	95.58	98.18	58	64	5.47	6.76	11	9	5.08	4.37	191.84	163.1
R32	verb+cond-	13.89	59	1.08	0.72	1.4	2.4	13.1	13.94	97.09	103.31	46	84	5.09	4.2	8	8	2.92	2.27	149.61	150.13
L1	verb-cond-	15.72	55	-1.29	-1.64	3.64	5.58	18.55	15.07	117.98	95.83	52	0	7.9	2.95	15	15	2.93	1.94	171.47	141.14
L3	verb-cond-	19.74	65	-0.48	-1.62	1.27	1.1	17.93	17.57	90.84	89.01	54	32	5.53	6.15	12	13	5.69	4.44	144.37	164.4
L5	verb-cond-	13.17	58	-1.07	-0.82	5.58	5.32	11.35	10.32	86.13	78.36	52	0	5.56	5.38	8	10	6.69	5.65	211.86	201.14
L7	verb-cond-	20.04	59	-1.87	-1.58	6.12	6.13	19.89	18.34	99.23	91.5	42	10	7.7	7.56	12	11	2.78	2.77	161.13	153.25
L12	verb-cond-	19.29	54	-1	-1.47	3.55	5.44	21.93	18.28	113.67	94.73	42	0	6.54	2.11	10	14	2.21	2.15	158.66	176.2
L25	verb-cond-	15.04	40	-0.5	-1	2.3	1.7	13.38	13.84	88.95	92.01	54	68	5.7	5.2	15	16	2.91	3.18	147.7	137.39
L26	verb-cond-	14.38	51	-1	-1	2	5.5	13.13	12.53	91.27	87.13	50	12	6.4	2.4	12	13	1.92	5.19	151.3	145.37
L27	verb-cond-	20.26	65	-1	-1.5	3.5	2.7	18.68	15.89	92.18	78.41	52	58	6	2.4	14	14	2.62	2.59	121.82	140.12
L28	verb-cond-	15.19	38	0	-1	2.26	0	15.98	17.55	105.24	115.53	44	98	7.64	8.08	13	15	1.44	4.55	162.41	152.87
L30	verb-cond-	20.91	55	0	-0.89	4.81	3.87	20.55	16.35	98.29	78.18	48	0	9.28	7.58	7	9	2.81	5.12	144.09	155.14
L32	verb-cond-	16.89	43	-1.56	-0.6	0	0.19	15.36	15.41	90.95	91.22	52	50	5.02	4.53	11	11	4.06	3.48	164.34	139.84
L2	verb-cond+	19.85	50	-2.86	-2.6	1.08	2.33	21.91	19.83	110.37	99.87	48	18	5.13	4.03	13	14	2.53	2.96	155.1	131.67
L4	verb-cond+	15.96	68	0.98	0.85	0	1.11	15.67	16.5	98.16	103.37	50	88	8.16	4.62	11	13	5.65	5.11	163.7	149.5
L8	verb-cond+	18.06	59	-0.82	-0.5	0.59	3.38	15.82	15.14	87.6	83.82	46	10	6.15	4.46	12	13	4	4.53	184.07	132.91
L9	verb-cond+	17.91	56	-1.65	-1.54	4.68	6.58	16.8	14	93.78	78.14	48	4	7.51	2.89	11	15	4.8	1.4	173.65	141.87
L10	verb-cond+	21.4	61	-1.09	-0.6	0	1.22	17.03	17.22	79.58	80.48	48	58	4.59	3.26	14	15	1.2	2.32	165.77	151.88
L19	verb-cond+	14.19	55	-0.32	-1.49	4.84	5.09	13.23	13.1	93.22	92.28	48	42	8.21	6.42	8	10	2.85	2.47	213.8	213.6
L20	verb-cond+	17.92	57	-0.98	-0.96	0	2.8	15.84	14.36	88.4	80.11	48	10	2.83	2.96	13	14	5.51	4.94	201.47	189.31
L21	verb-cond+	20.24	52	0	0	0	2.43	16.85	16.14	83.27	79.74	58	10	3.87	3.15	10	11	2.31	3.96	179.85	176.4
L22	verb-cond+	16.72	54	-1.11	-0.42	1.23	4.28	17.77	17.52	106.27	104.76	62	38	5.94	4.78	12	13	6.02	5.52	157.38	144.91
L23	verb-cond+	18.87	49	0	-1.06	0	7.2	15.37	15.96	81.45	84.59	48	96	9.21	7.26	11	11	2.28	1.61	181.67	157.84
L24	verb-cond+	18.73	51	-0.98	-2	4.06	6.45	21.93	19.64	117.05	104.82	56	0	7.33	3.36	8	15	4.57	2.62	135.32	150.86
L29	verb-cond+	16.41	58	-0.94	-0.92	4.78	5.16	12.73	12.69	77.57	77.3	50	44	5.79	4.69	11	13	2.5	2.45	196.29	201.58

## Sheet: CODIFICATION
_B	Baseline
_F	Final
_1	First application
_2	Second application
